# Supplementary material for: Coevolutionary data-based interaction networks approach highlighting key residues across protein families: The case of the G-protein coupled receptors
Source: PubMed Central journal article supplement — Comput Struct Biotechnol J. 2020 May 15;18:1153–9. doi: 10.1016/j.csbj.2020.05.003 (PMC7260681; doi:10.1016/j.csbj.2020.05.003), 2020-05-15
Supplement: mmc1.pdf [file mmc1.pdf]

# Interaction Networks Obtained From Coevolutionary Data Highlight Key Residues across Protein Families: the Case of the G-protein Coupled Receptors

Filippo Baldessari<sup>a</sup>, Riccardo Capelli<sup>b,c</sup>, Alejandro Giorgetti<sup>a,b</sup>, Paolo Carloni<sup>b</sup>

<sup>a</sup> Department of Biotechnology, University of Verona, Ca' Vignal 1, strada Le Grazie 15, I-37134 Verona, Italy

<sup>b</sup> Computational Biomedicine Section, IAS-5/INM-9, Forschungszentrum Juelich, Wilhelm-Johnen-straße, D-52425 Juelich, Germany

<sup>c</sup> Present Address: Department of Applied Science and Technology (DISAT), Politecnico di Torino, Corso Duca degli Abruzzi 24, I-10129 Torino, Italy

Table 1 SI. Hotspots for each of the structures analysed in the active and inactive states respectively. SeqPos indicates the residue number; BWPos, indicates the Ballesteros-Weinstein position. Highlighted positions are functional: orange highlighting represents positions in contact with ligand binding.

| 5HT1B_HUMAN  |        |     |         |                |        |     |           |
|--------------|--------|-----|---------|----------------|--------|-----|-----------|
| Active State |        |     |         | Inactive State |        |     |           |
| SeqPos:      | BWPos: | AA: | Source: | SeqPos:        | BWPos: | AA: | Source:   |
| 129          | 3x32   | D   | [4][5]  | 53             | 1x36   | V   |           |
| 134          | 3x37   | T   |         | 95             | 2x50   | D   | [3]       |
| 137          | 3x40   | I   | [1][2]  | 96             | 2x51   | L   |           |
| 141          | 3x44   | C   | [2]     | 106            | 2x60   | I   |           |
| 212          | 5x43   | T   |         | 129            | 3x32   | D   | [4][5]    |
|              |        |     |         | 132            | 3x35   | C   |           |
|              |        |     |         | 133            | 3x36   | C   | [4][5][6] |
|              |        |     |         | 134            | 3x37   | T   |           |
|              |        |     |         | 136            | 3x39   | S   | [3]       |
|              |        |     |         | 141            | 3x44   | C   | [2]       |
|              |        |     |         | 147            | 3x50   | R   | [1][3]    |
|              |        |     |         | 180            | 4x56   | I   |           |
|              |        |     |         | 208            | 5x39   | T   |           |
|              |        |     |         | 212            | 5x43   | T   |           |
|              |        |     |         | 224            | 5x54   | L   |           |
|              |        |     |         | 227            | 5x57   | L   | [8]       |
|              |        |     |         | 309            | 6x30   | E   | [1]       |
|              |        |     |         | 317            | 6x38   | G   |           |
|              |        |     |         | 324            | 6x45   | I   |           |

| 5HT2A_HUMAN  |        |     |         |                |        |     |         |
|--------------|--------|-----|---------|----------------|--------|-----|---------|
| Active State |        |     |         | Inactive State |        |     |         |
| SeqPos:      | BWPos: | AA: | Source: | SeqPos:        | BWPos: | AA: | Source: |
| 120          | 2x50   | D   | [3]     | 120            | 2x50   | D   | [3]     |
| 131          | 2x60   | V   |         | 128            | 2x57   | V   | [10]    |
| 139          | Loop   | Y   |         | 160            | 3x37   | T   |         |
| 158          | 3x35   | F   |         | 162            | 3x39   | S   | [3]     |
| 160          | 3x37   | T   |         | 165            | 3x42   | H   |         |
| 162          | 3x39   | S   | [3]     | 170            | 3x47   | S   |         |
| 166          | 3x43   | L   | [3]     | 173            | 3x50   | R   | [1][3]  |
| 173          | 3x50   | R   | [1][3]  |                |        |     |         |
| 257          | 5x61   | T   |         |                |        |     |         |
| 332          | 6x44   | F   | [3]     |                |        |     |         |

| 5HT2B_HUMAN  |        |     |         |                |        |     |         |
|--------------|--------|-----|---------|----------------|--------|-----|---------|
| Active State |        |     |         | Inactive State |        |     |         |
| SeqPos:      | BWPos: | AA: | Source: | SeqPos:        | BWPos: | AA: | Source: |
| 65           | 1x43   | I   |         | 70             | 1x48   | G   |         |
| 75           | 1x53   | V   | [8]     | 93             | 2x43   | L   | [6]     |
| 100          | 2x50   | D   | [3]     | 100            | 2x50   | D   | [3]     |
| 136          | 3x33   | V   | [4][5]  | 104            | 2x54   | I   |         |
| 140          | 3x37   | T   |         | 108            | 2x57   | V   | [10]    |
| 142          | 3x39   | S   | [3]     | 113            | 2x62   | L   |         |
| 144          | 3x41   | M   |         | 121            | Loop   | W   |         |
| 221          | 5x43   | S   |         | 131            | 3x28   | W   |         |
| 240          | 5x61   | T   |         | 142            | 3x39   | S   | [3]     |
| 316          | 6x27   | I   |         | 144            | 3x41   | M   |         |
| 318          | 6x29   | N   |         | 149            | 3x46   | I   | [8]     |
| 322          | 6x33   | A   |         | 153            | 3x50   | R   | [1][3]  |
| 344          | 6x55   | N   | [4,5]   | 157            | 3x54   | I   |         |
| 374          | 7x47   | G   |         | 236            | 5x57   | T   | [8]     |
|              |        |     |         | 319            | 6x30   | E   | [1]     |
|              |        |     |         | 322            | 6x33   | A   |         |
|              |        |     |         | 374            | 7x47   | G   |         |
|              |        |     |         | 384            | 8x47   | N   |         |
|              |        |     |         | 394            | 8x57   | I   |         |

| 5HT2C_HUMAN  |        |     |         |                |        |     |         |
|--------------|--------|-----|---------|----------------|--------|-----|---------|
| Active State |        |     |         | Inactive State |        |     |         |
| SeqPos:      | BWPos: | AA: | Source: | SeqPos:        | BWPos: | AA: | Source: |
| 99           | 2x50   | D   | [3]     | 134            | 3x32   | D   | [4][5]  |
| 134          | 3x32   | D   | [4][5]  | 139            | 3x37   | T   |         |
| 139          | 3x37   | T   |         | 144            | 3x42   | H   |         |
| 141          | 3x39   | S   | [3]     |                |        |     |         |
| 144          | 3x42   | H   |         |                |        |     |         |
| 209          | Loop   | L   |         |                |        |     |         |
| 320          | 6x44   | F   | [3]     |                |        |     |         |

| AA1R_HUMAN   |        |     |         |                |        |     |         |
|--------------|--------|-----|---------|----------------|--------|-----|---------|
| Active State |        |     |         | Inactive State |        |     |         |
| SeqPos:      | BWPos: | AA: | Source: | SeqPos:        | BWPos: | AA: | Source: |
| 92           | 3x37   | Q   |         | 92             | 3x37   | Q   |         |
| 94           | 3x39   | S   | [3]     | 94             | 3x39   | S   | [3]     |
| 99           | 3x44   | L   | [2]     |                |        |     |         |
| 139          | 4x57   | G   |         |                |        |     |         |
| 199          | 5x57   | I   | [8]     |                |        |     |         |

| AA2AR_HUMAN  |        |     |         |                |        |     |         |
|--------------|--------|-----|---------|----------------|--------|-----|---------|
| Active State |        |     |         | Inactive State |        |     |         |
| SeqPos:      | BWPos: | AA: | Source: | SeqPos:        | BWPos: | AA: | Source: |
| 20           | 1x46   | A   |         | 89             | 3x37   | Q   | [1]     |
| 49           | 2x47   | A   |         | 91             | 3x39   | S   | [3]     |
| 63           | 2x60   | F   |         | 93             | 3x41   | F   |         |
| 89           | 3x37   | Q   | [1]     | 97             | 3x45   | A   |         |
| 91           | 3x39   | S   | [3]     | 102            | 3x50   | R   | [1][3]  |
| 93           | 3x41   | F   |         |                |        |     |         |
| 102          | 3x50   | R   | [1][3]  |                |        |     |         |
| 129          | 4x50   | W   | [1]     |                |        |     |         |
| 172          | Loop   | V   |         |                |        |     |         |
| 283          | 7x48   | V   |         |                |        |     |         |
| 290          | 7x55   | Y   |         |                |        |     |         |
| 299          | 8x54   | F   |         |                |        |     |         |

| ACM1_HUMAN   |        |     |         |                |        |     |         |
|--------------|--------|-----|---------|----------------|--------|-----|---------|
| Active State |        |     |         | Inactive State |        |     |         |
| SeqPos:      | BWPos: | AA: | Source: | SeqPos:        | BWPos: | AA: | Source: |
| 36           | 1x43   | S   |         | 64             | 2x43   | L   | [6]     |
| 43           | 1x50   | N   |         | 71             | 2x50   | D   | [3]     |
| 59           | 2x38   | V   |         | 78             | 2x56   | F   |         |
| 71           | 2x50   | D   | [3]     | 106            | 3x33   | Y   | [4][5]  |
| 78           | 2x56   | F   |         | 114            | 3x41   | M   |         |
| 101          | 3x28   | W   |         | 123            | 3x50   | R   | [1][3]  |
| 102          | 3x29   | L   |         | 366            | 6x36   | T   |         |
| 106          | 3x33   | Y   | [4][5]  | 367            | 6x37   | L   | [8]     |
| 110          | 3x37   | N   |         | 412            | 7x47   | T   |         |
| 114          | 3x41   | M   |         | 414            | 7x49   | N   | [3]     |
| 123          | 3x50   | R   | [1][3]  |                |        |     |         |
| 367          | 6x37   | L   | [8]     |                |        |     |         |
| 385          | 6x55   | V   | [4][5]  |                |        |     |         |
| 412          | 7x47   | T   |         |                |        |     |         |
| 414          | 7x49   | N   | [3]     |                |        |     |         |
| 418          | 7x53   | Y   | [1]     |                |        |     |         |

| ACM2_HUMAN   |        |     |         |                |        |     |         |
|--------------|--------|-----|---------|----------------|--------|-----|---------|
| Active State |        |     |         | Inactive State |        |     |         |
| SeqPos:      | BWPos: | AA: | Source: | SeqPos:        | BWPos: | AA: | Source: |
| 45           | 1x54   | M   |         | 69             | 2x50   | D   | [3]     |
| 58           | 2x39   | N   |         | 77             | 2x57   | S   | [10]    |
| 69           | 2x50   | D   | [3]     | 99             | 3x28   | W   |         |
| 77           | 2x57   | S   | [10]    | 105            | 3x34   | V   |         |
| 81           | 2x61   | Y   |         | 110            | 3x39   | S   | [3]     |
| 100          | 3x29   | L   |         | 113            | 3x42   | N   |         |
| 108          | 3x37   | N   |         | 118            | 3x47   | S   |         |
| 110          | 3x39   | S   | [3]     | 121            | 3x50   | R   | [1][3]  |
| 115          | 3x44   | L   | [2]     | 210            | 5x62   | S   | [8]     |
| 147          | 4x49   | A   |         |                |        |     |         |
| 177          | Loop   | Q   |         |                |        |     |         |
| 392          | 6x40   | I   | [3]     |                |        |     |         |
| 436          | 7x49   | N   | [3]     |                |        |     |         |

| ACM4_HUMAN   |        |     |         |                |        |     |         |
|--------------|--------|-----|---------|----------------|--------|-----|---------|
| Active State |        |     |         | Inactive State |        |     |         |
| SeqPos:      | BWPos: | AA: | Source: | SeqPos:        | BWPos: | AA: | Source: |
| 54           | 1x54   | M   |         | 54             | 1x54   | M   |         |
| 86           | 2x57   | S   | [10]    | 78             | 2x50   | D   | [3]     |
| 88           | 2x59   | N   |         | 86             | 2x57   | S   | [10]    |
| 106          | 3x26   | D   |         | 88             | 2x59   | N   |         |
| 117          | 3x37   | N   |         | 130            | 3x50   | R   | [1][3]  |
| 119          | 3x39   | S   | [3]     | 401            | 6x36   | T   |         |
| 120          | 3x40   | V   | [1][2]  | 449            | 7x49   | N   | [3]     |
| 125          | 3x45   | I   |         |                |        |     |         |
| 130          | 3x50   | R   | [1][3]  |                |        |     |         |
| 165          | 4x58   | A   |         |                |        |     |         |
| 391          | 6x26   | M   |         |                |        |     |         |
| 396          | 6x31   | R   |         |                |        |     |         |
| 401          | 6x36   | T   |         |                |        |     |         |
| 405          | 6x40   | I   | [3]     |                |        |     |         |
| 438          | 7x37   | I   |         |                |        |     |         |
| 447          | 7x47   | T   |         |                |        |     |         |

| ADRB2_HUMAN  |        |     |         |                |        |     |         |
|--------------|--------|-----|---------|----------------|--------|-----|---------|
| Active State |        |     |         | Inactive State |        |     |         |
| SeqPos:      | BWPos: | AA: | Source: | SeqPos:        | BWPos: | AA: | Source: |
| 47           | 1x46   | I   |         | 87             | 2x57   | V   | [10]    |
| 87           | 2x57   | V   | [10]    | 91             | 2x61   | G   |         |
| 91           | 2x61   | G   |         | 116            | 3x35   | C   |         |
| 116          | 3x35   | C   |         | 122            | 3x41   | E   |         |
| 122          | 3x41   | E   |         | 126            | 3x45   | V   |         |
| 158          | 4x50   | W   | [1]     | 131            | 3x50   | R   | [1][3]  |
| 265          | 6x27   | C   |         | 158            | 4x50   | W   | [3]     |
| 274          | 6x36   | T   |         | 229            | 5x68   | Q   |         |

|     |      |   |  |     |      |   |     |
|-----|------|---|--|-----|------|---|-----|
| 277 | 6x39 | I |  | 268 | 6x30 | E | [1] |
| 285 | 6x47 | C |  | 272 | 6x34 | L |     |
| 321 | 7x48 | F |  | 285 | 6x47 | C |     |
|     |      |   |  | 321 | 7x48 | F |     |

| AGTR1_HUMAN  |        |     |         |                |        |     |         |
|--------------|--------|-----|---------|----------------|--------|-----|---------|
| Active State |        |     |         | Inactive State |        |     |         |
| SeqPos:      | BWPos: | AA: | Source: | SeqPos:        | BWPos: | AA: | Source: |
| 101          | 3x25   | C   | [5][7]  | 67             | 2x43   | L   | [6]     |
| 110          | 3x34   | F   |         | 74             | 2x50   | D   | [3]     |
| 112          | 3x36   | L   |         | 101            | 3x25   | C   | [5][7]  |
| 115          | 3x39   | S   | [3]     | 106            | 3x30   | A   |         |
| 117          | 3x41   | F   |         | 110            | 3x34   | F   |         |
| 118          | 3x42   | L   |         | 111            | 3x35   | N   |         |
| 123          | 3x47   | S   |         | 112            | 3x36   | L   |         |
| 163          | 4x61   | I   |         | 117            | 3x41   | F   |         |
| 199          | 5x43   | N   |         | 118            | 3x42   | L   |         |
|              |        |     |         | 123            | 3x47   | S   |         |
|              |        |     |         | 159            | 4x56   | A   |         |
|              |        |     |         | 163            | 4x61   | I   |         |
|              |        |     |         | 199            | 5x43   | N   |         |
|              |        |     |         | 214            | 5x57   | S   | [8]     |
|              |        |     |         | 241            | 6x36   | I   |         |
|              |        |     |         | 245            | 6x40   | I   | [3]     |
|              |        |     |         | 298            | 7x49   | N   | [3]     |

| APJ_HUMAN    |        |     |         |                |        |     |         |
|--------------|--------|-----|---------|----------------|--------|-----|---------|
| Active State |        |     |         | Inactive State |        |     |         |
| SeqPos:      | BWPos: | AA: | Source: | SeqPos:        | BWPos: | AA: | Source: |
| 75           | 2x50   | D   | [3]     | 75             | 2x50   | D   | [3]     |
| 105          | 3x28   | S   |         | 105            | 3x28   | S   |         |
| 109          | 3x32   | I   | [4][5]  | 109            | 3x32   | I   | [4][5]  |
| 112          | 3x35   | N   |         | 112            | 3x35   | N   |         |
| 113          | 3x36   | M   |         | 113            | 3x36   | M   |         |
| 116          | 3x39   | S   | [3]     | 116            | 3x39   | S   | [3]     |
|              |        |     |         | 118            | 3x41   | F   |         |
|              |        |     |         | 119            | 3x42   | C   |         |
|              |        |     |         | 122            | 3x45   | G   |         |
|              |        |     |         | 124            | 3x47   | S   |         |
|              |        |     |         | 257            | 6x44   | F   | [3]     |
|              |        |     |         | 260            | 6x47   | C   |         |
|              |        |     |         | 296            | 7x39   | T   | [4][5]  |
|              |        |     |         | 305            | 7x49   | N   | [3]     |
|              |        |     |         | 313            | 8x47   | D   |         |

| CCR1_HUMAN   |        |     |         |                |        |     |         |
|--------------|--------|-----|---------|----------------|--------|-----|---------|
| Active State |        |     |         | Inactive State |        |     |         |
| SeqPos:      | BWPos: | AA: | Source: | SeqPos:        | BWPos: | AA: | Source: |

|      |      |      |  |     |      |   |        |
|------|------|------|--|-----|------|---|--------|
| none | none | none |  | 55  | 1x53 | V | [8]    |
|      |      |      |  | 86  | 2x56 | T |        |
|      |      |      |  | 93  | 2x63 | Y |        |
|      |      |      |  | 116 | 3x35 | G |        |
|      |      |      |  | 123 | 3x44 | I | [2]    |
|      |      |      |  | 154 | 4x46 | S |        |
|      |      |      |  | 158 | 4x50 | W | [1]    |
|      |      |      |  | 211 | 5x50 | P | [3]    |
|      |      |      |  | 259 | 6x55 | I | [4][5] |

| CCR2_HUMAN   |        |      |         |                |        |     |         |
|--------------|--------|------|---------|----------------|--------|-----|---------|
| Active State |        |      |         | Inactive State |        |     |         |
| SeqPos:      | BWPos: | AA:  | Source: | SeqPos:        | BWPos: | AA: | Source: |
| none         | none   | none | none    | 81             | 2x43   | L   | [6]     |
|              |        |      |         | 94             | 2x56   | T   |         |
|              |        |      |         | 123            | 3x35   | G   |         |
|              |        |      |         | 130            | 3x42   | F   |         |
|              |        |      |         | 202            | 5x39   | T   |         |

| CCR3_HUMAN   |        |      |         |                |        |      |         |
|--------------|--------|------|---------|----------------|--------|------|---------|
| Active State |        |      |         | Inactive State |        |      |         |
| SeqPos:      | BWPos: | AA:  | Source: | SeqPos:        | BWPos: | AA:  | Source: |
| none         | none   | none | none    | 72             | 2x42   | Y    |         |
|              |        |      |         | 73             | 2x43   | L    | [6]     |
|              |        |      |         | 90             | 2x46   | L    | [3]     |
|              |        |      |         | 112            | Loop   | F    |         |
|              |        |      |         | 113            | Loop   | Y    |         |
|              |        |      |         | 114            | Loop   | H    |         |
|              |        |      |         | 116            | 3x22   | D    |         |
|              |        |      |         | 123            | 3x29   | S    |         |
|              |        |      |         | 131            | 3x37   | Y    |         |
|              |        |      |         | 154            | Loop   | S    |         |
|              |        |      |         | 158            | 4x35   | LOOP |         |
|              |        |      |         | 165            | 4x42   | G    |         |
|              |        |      |         | 197            | Loop   | H    |         |
|              |        |      |         | 202            | Loop   | R    |         |
|              |        |      |         | 215            | 5x40   | L    |         |
|              |        |      |         | 234            | 5x58   | Y    | [1]     |
|              |        |      |         | 242            | 5x66   | L    |         |
|              |        |      |         | 247            | Loop   | V    |         |
|              |        |      |         | 284            | 6x65   | F    |         |
|              |        |      |         | 293            | 7x28   | S    |         |

| CCR5_HUMAN   |        |      |         |                |        |     |         |
|--------------|--------|------|---------|----------------|--------|-----|---------|
| Active State |        |      |         | Inactive State |        |     |         |
| SeqPos:      | BWPos: | AA:  | Source: | SeqPos:        | BWPos: | AA: | Source: |
| none         | none   | none | none    | 37             | 1x39   | Y   |         |
|              |        |      |         | 75             | 2x49   | S   | [10]    |
|              |        |      |         | 82             | 2x56   | T   |         |
|              |        |      |         | 111            | 3x35   | G   |         |
|              |        |      |         | 115            | 3x39   | G   |         |
|              |        |      |         | 118            | 3x42   | F   |         |
|              |        |      |         | 145            | 4x42   | G   |         |
|              |        |      |         | 153            | 4x50   | W   | [1]     |
|              |        |      |         | 157            | 4x54   | V   |         |
|              |        |      |         | 289            | 7x45   | A   |         |

| CCR9_HUMAN   |        |      |         |                |        |     |         |
|--------------|--------|------|---------|----------------|--------|-----|---------|
| Active State |        |      |         | Inactive State |        |     |         |
| SeqPos:      | BWPos: | AA:  | Source: | SeqPos:        | BWPos: | AA: | Source: |
| none         | none   | none | none    | 129            | 3x35   | N   |         |
|              |        |      |         | 135            | 3x41   | L   |         |
|              |        |      |         | 264            | 6x45   | V   |         |
|              |        |      |         | 267            | 6x48   | Q   |         |
|              |        |      |         | 321            | 8x47   | G   |         |

| CCRL2_HUMAN  |        |      |         |                |        |     |         |
|--------------|--------|------|---------|----------------|--------|-----|---------|
| Active State |        |      |         | Inactive State |        |     |         |
| SeqPos:      | BWPos: | AA:  | Source: | SeqPos:        | BWPos: | AA: | Source: |
| none         | none   | none | none    | 113            | 3x35   | G   |         |
|              |        |      |         | 115            | 3x37   | Y   |         |
|              |        |      |         | 118            | 3x40   | T   |         |
|              |        |      |         | 119            | 3x41   | F   |         |
|              |        |      |         | 293            | 7x46   | C   | [3]     |

| CNR1_HUMAN   |        |     |         |                |        |     |         |
|--------------|--------|-----|---------|----------------|--------|-----|---------|
| Active State |        |     |         | Inactive State |        |     |         |
| SeqPos:      | BWPos: | AA: | Source: | SeqPos:        | BWPos: | AA: | Source: |
| 163          | 2x50   | D   | [3]     | 109            | Loop   | M   |         |
| 194          | 3x30   | G   |         | 115            | 1x31   | Q   |         |
| 199          | 3x35   | S   |         | 147            | Loop   | L   |         |
| 201          | 3x37   | T   |         | 163            | 2x50   | D   | [3]     |
| 204          | 3x40   | V   | [1][2]  | 192            | 3x28   | K   |         |
| 209          | 3x45   | L   |         | 194            | 3x30   | G   |         |
| 214          | 3x50   | R   | [1][3]  | 196            | 3x32   | V   | [4][5]  |
| 393          | 7x49   | N   | [3]     | 201            | 3x37   | T   |         |
|              |        |     |         | 203            | 3x39   | S   | [3]     |
|              |        |     |         | 204            | 3x40   | V   | [1][2]  |
|              |        |     |         | 206            | 3x42   | S   |         |
|              |        |     |         | 209            | 3x45   | L   |         |

|     |      |   |           |
|-----|------|---|-----------|
| 211 | 3x47 | A |           |
| 214 | 3x50 | R | [1][3]    |
| 215 | 3x51 | Y | [8]       |
| 270 | Loop | H |           |
| 304 | 5x68 | H |           |
| 338 | 6x30 | D | [1]       |
| 339 | 6x31 | I |           |
| 352 | 6x44 | L |           |
| 356 | 6x48 | W | [3][4][5] |
| 357 | 6x49 | G |           |
| 358 | 6x50 | P |           |
| 379 | 7x34 | V |           |
| 382 | 7x37 | F |           |
| 406 | 8x52 | H |           |

| CNR2_HUMAN   |        |     |           |                |        |     |           |
|--------------|--------|-----|-----------|----------------|--------|-----|-----------|
| Active State |        |     |           | Inactive State |        |     |           |
| SeqPos:      | BWPos: | AA: | Source:   | SeqPos:        | BWPos: | AA: | Source:   |
| 80           | 2x50   | D   | [3]       | 73             | 2x43   | I   | [6]       |
| 87           | 2x57   | F   | [10]      | 78             | 2x48   | G   |           |
| 117          | 3x36   | F   | [4][5][6] | 86             | 2x56   | V   |           |
| 122          | 3x41   | G   |           | 87             | 2x57   | F   | [10]      |
| 128          | 3x47   | A   |           | 127            | 3x46   | T   | [8]       |
| 209          | 5x58   | Y   | [1]       | 131            | 3x50   | R   | [1][3]    |
| 214          | 5x63   | W   |           | 247            | 6x37   | L   | [8]       |
|              |        |     |           | 248            | 6x38   | G   |           |
|              |        |     |           | 258            | 6x48   | W   | [3][4][5] |
|              |        |     |           | 303            | 8x47   | S   |           |

| DRD2_HUMAN   |        |     |         |                |        |     |         |
|--------------|--------|-----|---------|----------------|--------|-----|---------|
| Active State |        |     |         | Inactive State |        |     |         |
| SeqPos:      | BWPos: | AA: | Source: | SeqPos:        | BWPos: | AA: | Source: |
| 48           | 1x46   | I   |         | 117            | 3x35   | M   |         |
| 117          | 3x35   | M   |         | 119            | 3x37   | T   |         |
| 119          | 3x37   | T   |         | 121            | 3x39   | S   | [3]     |
| 124          | 3x42   | N   |         | 124            | 3x43   | L   | [3]     |
| 193          | 5x43   | S   |         | 126            | 3x44   | C   | [2]     |
| 208          | 5x57   | V   | [8]     | 129            | 3x47   | S   |         |
| 377          | 6x39   | I   |         | 132            | 3x50   | R   | [1][3]  |
| 421          | 7x48   | V   |         | 193            | 5x43   | S   |         |
| 429          | 7x56   | F   |         | 205            | 5x54   | T   |         |
|              |        |     |         | 208            | 5x57   | V   | [8]     |
|              |        |     |         | 368            | 6x30   | E   | [1]     |
|              |        |     |         | 383            | 6x45   | I   |         |
|              |        |     |         | 409            | 7x35   | Y   | [4][5]  |



| DRD3_HUMAN   |        |     |         |                |        |     |         |
|--------------|--------|-----|---------|----------------|--------|-----|---------|
| Active State |        |     |         | Inactive State |        |     |         |
| SeqPos:      | BWPos: | AA: | Source: | SeqPos:        | BWPos: | AA: | Source: |
| 75           | 2x50   | D   | [3]     | 68             | 2x43   | V   | [6]     |
| 115          | 3x37   | T   |         | 75             | 2x50   | D   | [3]     |
| 117          | 3x39   | S   | [3]     | 83             | 2x57   | V   | [10]    |
| 120          | 3x42   | N   |         | 90             | 2x64   | L   |         |
| 124          | 3x46   | I   | [8]     | 115            | 3x37   | T   |         |
| 125          | 3x47   | S   |         | 117            | 3x39   | S   | [3]     |
| 153          | 4x45   | M   |         | 120            | 3x42   | N   |         |
| 204          | 5x54   | T   |         | 124            | 3x46   | I   | [8]     |
| 206          | 5x56   | L   |         | 125            | 3x47   | S   |         |
| 207          | 5x57   | V   | [8]     | 128            | 3x50   | R   | [1][3]  |
| 211          | 5x61   | I   |         | 192            | 5x43   | S   |         |
| 324          | 6x30   | E   | [1]     | 207            | 5x57   | V   | [8]     |
| 327          | 6x33   | A   |         | 324            | 6x30   | E   | [1]     |
| 339          | 6x45   | I   |         | 335            | 6x41   | L   | [3]     |
| 343          | 6x49   | L   |         | 339            | 6x45   | I   |         |
| 366          | 7x35   | Y   | [4][5]  | 366            | 7x35   | Y   | [4][5]  |
| 379          | 7x49   | N   | [3]     |                |        |     |         |

| DRD4_HUMAN   |        |     |           |                |        |     |           |
|--------------|--------|-----|-----------|----------------|--------|-----|-----------|
| Active State |        |     |           | Inactive State |        |     |           |
| SeqPos:      | BWPos: | AA: | Source:   | SeqPos:        | BWPos: | AA: | Source:   |
| 45           | 1x43   | I   |           | 56             | 1x54   | C   |           |
| 48           | 1x46   | V   |           | 73             | 2x43   | I   | [6]       |
| 81           | 2x51   | L   |           | 80             | 2x50   | D   | [3]       |
| 87           | 2x56   | L   |           | 88             | 2x57   | V   | [10]      |
| 88           | 2x57   | V   | [10]      | 108            | 3x25   | C   | [5][7]    |
| 116          | 3x33   | V   | [4][5]    | 113            | 3x30   | A   |           |
| 119          | 3x36   | C   | [4][5][6] | 118            | 3x35   | L   |           |
| 120          | 3x37   | T   |           | 122            | 3x39   | S   | [3]       |
| 122          | 3x39   | S   | [3]       | 128            | 3x45   | A   |           |
| 125          | 3x42   | N   |           | 133            | 3x50   | R   | [1][3]    |
| 211          | 5x57   | L   | [8]       | 160            | 4x50   | W   | [1]       |
| 442          | 7x47   | A   |           | 399            | 6x40   | V   | [3]       |
|              |        |     |           | 407            | 6x48   | W   | [3][4][5] |
|              |        |     |           | 440            | 7x45   | N   | [3]       |

| OPRD_HUMAN   |        |     |           |                |        |     |           |
|--------------|--------|-----|-----------|----------------|--------|-----|-----------|
| Active State |        |     |           | Inactive State |        |     |           |
| SeqPos:      | BWPos: | AA: | Source:   | SeqPos:        | BWPos: | AA: | Source:   |
| 105          | 2x60   | Q   |           | 70             | 1x53   | V   | [8]       |
| 130          | 3x34   | Y   |           | 95             | 2x50   | D   | [3]       |
| 132          | 3x36   | M   | [4][5][6] | 130            | 3x34   | Y   |           |
| 134          | 3x38   | T   |           | 131            | 3x35   | N   | [3]       |
| 135          | 3x39   | S   | [3]       | 132            | 3x36   | M   | [4][5][6] |
| 136          | 3x40   | I   | [1][2]    | 133            | 3x37   | F   |           |

|     |      |   |           |     |      |   |           |
|-----|------|---|-----------|-----|------|---|-----------|
| 141 | 3x45 | M |           | 135 | 3x39 | S | [3]       |
| 146 | 3x50 | R | [1][3]    | 217 | 5x43 | F |           |
| 266 | 6x40 | V | [3]       | 264 | 6x38 | L |           |
| 273 | 6x47 | C |           | 266 | 6x40 | V | [3]       |
| 274 | 6x48 | W | [3][4][5] | 273 | 6x47 | C |           |
| 314 | 7x49 | N | [3]       | 274 | 6x48 | W | [3][4][5] |
| 321 | 7x56 | L |           | 301 | 7x35 | L | [4][5]    |
| 322 | 8x47 | D |           | 314 | 7x49 | N | [3]       |
|     |      |   |           | 321 | 7x56 | L |           |

| OPRK_HUMAN   |        |     |         |                |        |     |         |
|--------------|--------|-----|---------|----------------|--------|-----|---------|
| Active State |        |     |         | Inactive State |        |     |         |
| SeqPos:      | BWPos: | AA: | Source: | SeqPos:        | BWPos: | AA: | Source: |
| 98           | 2x43   | I   | [6]     | 98             | 2x43   | I   | [6]     |
| 141          | 3x35   | N   |         | 105            | 2x50   | D   | [3]     |
| 142          | 3x36   | M   | [4][5]  | 135            | 3x29   | I   |         |
| 145          | 3x39   | S   | [3]     | 141            | 3x35   | N   |         |
| 286          | 6x50   | P   |         | 142            | 3x36   | M   | [4][5]  |
| 326          | 7x49   | N   | [3]     | 143            | 3x37   | F   |         |
|              |        |     |         | 145            | 3x39   | S   | [3]     |
|              |        |     |         | 279            | 6x40   | V   | [3]     |
|              |        |     |         | 315            | 7x37   | F   |         |
|              |        |     |         | 326            | 7x49   | N   | [3]     |

| OPRX_HUMAN   |        |     |           |                |        |     |           |
|--------------|--------|-----|-----------|----------------|--------|-----|-----------|
| Active State |        |     |           | Inactive State |        |     |           |
| SeqPos:      | BWPos: | AA: | Source:   | SeqPos:        | BWPos: | AA: | Source:   |
| 132          | 3x34   | Y   |           | 90             | 2x43   | I   |           |
| 134          | 3x36   | M   | [4][5][6] | 97             | 2x50   | D   |           |
| 135          | 3x37   | F   |           | 132            | 3x34   | Y   |           |
| 137          | 3x39   | S   | [3]       | 133            | 3x35   | N   |           |
| 139          | 3x41   | F   |           | 134            | 3x36   | M   | [4][5][6] |
| 143          | 3x45   | A   |           | 135            | 3x37   | F   |           |
| 148          | 3x50   | R   | [1][3]    | 148            | 3x50   | R   | [1][3]    |
| 182          | 4x57   | G   |           | 268            | 6x40   | V   | [3]       |
| 276          | 6x48   | W   | [3][4][5] | 276            | 6x48   | W   | [3][4][5] |
| 315          | 7x49   | N   | [3]       | 315            | 7x49   | N   | [3]       |

| OPSD_HUMAN   |        |     |         |                |        |     |         |
|--------------|--------|-----|---------|----------------|--------|-----|---------|
| Active State |        |     |         | Inactive State |        |     |         |
| SeqPos:      | BWPos: | AA: | Source: | SeqPos:        | BWPos: | AA: | Source: |
| 76           | 2x43   | L   | [6]     | 91             | 2x57   | G   | [10]    |
| 116          | 3x31   | F   |         | 116            | 3x31   | F   |         |
| 118          | 3x33   | T   | [4][5]  | 118            | 3x33   | T   | [4][5]  |
| 120          | 3x35   | G   |         | 120            | 3x35   | G   |         |
| 126          | 3x41   | W   |         | 126            | 3x41   | W   |         |
| 127          | 3x42   | S   |         | 127            | 3x42   | S   |         |
| 189          | Loop   | I   |         | 189            | Loop   | I   |         |







[4] M. Sandal, M. Behrens, A. Brockho, F. Musiani, A. Giorgetti, P. Carloni, W. Meyerhof, Evidence for a transient additional ligand binding site in the tas2r46 bitter taste receptor, *Journal of chemical theory and computation* 11 (9) (2015) 4439-4449.

[5] E. Suku, A. Giorgetti, Common evolutionary binding mode of rhodopsinlike gpcrs: Insights from structural bioinformatics, *AIMS Press, AIMS. Biophysics* 4 (2017) 543-556.

[6] B. Trzaskowski, D. Latek, S. Yuan, U. Ghoshdastider, A. Debinski, S. Filipek, Action of molecular switches in gpcrs-theoretical and experimental studies, *Current medicinal chemistry* 19 (8) (2012) 1090-1109.

[7] M. Wheatley, D. Wootten, M. T. Conner, J. Simms, R. Kendrick, R. T. Logan, D. R. Poyner, J. Barwell, Lifting the lid on gpcrs: the role of extracellular loops. *Br J Pharmacol* 165 (6) (2012) 1688-1703.

[8] Q. Zhou, D. Yang, M. Wu, Y. Guo, W. Guo, L. Zhong, X. Cai, A. Dai, W. Jang, E. I. Shakhnovich, Z.-J. Liu, R. C. Stevens, N. A. Lambert, M. M. Babu, M.-W. Wang, S. Zhao, Common activation mechanism of class A GPCRs, *eLife* 8 (2019) e50279.

[9] A. Venkatakrishnan, X. Deupi, G. Lebon, et al. Diverse activation pathways in class A GPCRs converge near the G-protein-coupling region. *Nature* 536 (2016), 484–487.

[10] A. Schönege, J. Gallion, L. Picard et al. Evolutionary action and structural basis of the allosteric switch controlling  $\beta$ 2AR functional selectivity. *Nat Commun* 8 (2017), 2169.

**Mutation Browser GPCRDdb**(<https://gpcrdb.org/>)

#### **Mutagenesis references:**

[11] C. Wang, Y. Jiang, J. Ma, H. Wu, D. Wacker, V. Katritch, G. W. Han, W. Liu, X. Huang, E. Vardy, J. D. McCorvy, X. Gao, E. X. Zhou, K. Melcher, C. Zhang, F. Bai, H. Yang, L. Yang, H. Jiang, B. L. Roth, V. Cherezov, R. C. Stevens, H. E. Xu, Structural Basis for Molecular Recognition at Serotonin Receptors. *Science* 340 (6132) (2013) 610-4.

[12] Sealfon SC, Chi L, Ebersole BJ, Rodic V, Zhang D, Ballesteros JA, Weinstein H., Related contribution of specific helix 2 and 7 residues to conformational activation of the serotonin 5-HT<sub>2A</sub> receptor. *J Biol Chem* 270 (28) (1995) 16683-8.

[13] Manivet P, Schneider B, Smith JC, Choi DS, Maroteaux L, Kellermann O, Launay JM., The serotonin binding site of human and murine 5-HT<sub>2B</sub> receptors: molecular modeling and site-directed mutagenesis. *J Biol Chem* 277(19) (2002) 17170-8.

[14] John D. McCorvy, Daniel Wacker, Sheng Wang, Bemnat Agegnehu, Jing Liu, Katherine Lansu, Alexandra R. Tribo, Reid H. J. Olsen, Tao Che, Jian Jin & Bryan L. Roth. Structural determinants of 5-HT<sub>2B</sub> receptor activation and biased agonism. *Nat Struct Mol Biol* 25(9) (2018) 787-796.

[15] Tania C. Córdova-Sintjago, Yue Liu, Raymond G. Booth, Molecular interactions of agonist and inverse agonist ligands at serotonin 5-HT<sub>2C</sub> G protein-coupled receptors: computational ligand docking and molecular dynamics studies validated by experimental mutagenesis results, *Molecular Physics Volume* 113 (3-4) (2015) 348-358.

[16] Peng Y., McCorvy J.D., Harpsøe K., Lansu K., Yuan S., Popov P., Qu L., Pu M., Che T., Nikolajsen L.F., Huang X.P., Wu Y., Shen L., Bjørn-Yoshimoto W.E., Ding K., Wacker D., Han G.W., Cheng J., Katritch V., Jensen A.A., Hanson M.A., Zhao S., Gloriam D.E., Roth B.L., Stevens R.C., Liu Z.J., 5-HT<sub>2C</sub> Receptor Structures Reveal the Structural Basis of GPCR Polypharmacology. *Cell* 172 (4) (2018) 719-730.

[17] Rivkees S.A., Barbhaiya H., IJzerman A.P, Identification of the adenine binding site of the human A1 adenosine receptor. *J Biol Chem* 274 (6) (1999) 3617-21.

- [18] Barbhaiya H., McClain R., Ijzerman A., Rivkees S.A., Site-directed mutagenesis of the human A1 adenosine receptor: influences of acidic and hydroxy residues in the first four transmembrane domains on ligand binding. *Mol Pharmacol* 50 (6) (1996) 1635-42.
- [19] Jiang Q., Van Rhee A.M., Kim J., Yehle S., Wess J., Jacobson K.A., Hydrophilic side chains in the third and seventh transmembrane helical domains of human A2A adenosine receptors are required for ligand recognition. *Mol Pharmacol* 50 (3) (1996) 512-21.
- [20] Kim, S.K. et al. Modeling the adenosine receptors: comparison of the binding domains of A2A agonists and antagonists. *J Med Chem* 46 (23) (2003) 4847-59.
- [21] Keov, P. et al. Molecular mechanisms of bitopic ligand engagement with the M1 muscarinic acetylcholine receptor. *J Biol Chem* 289(34) (2014) 23817-37.
- [22] Avlani, V.A. et al. Orthosteric and allosteric modes of interaction of novel selective agonists of the M1 muscarinic acetylcholine receptor.
- [23] Bourdon, H. et al. Modelling of the binding site of the human m1 muscarinic receptor: experimental validation and refinement. *J Comput Aided Mol* 11(4) (1997) 317-32.
- [24] Matsui, H. et al. Probing of the location of the allosteric site on m1 muscarinic receptors by site-directed mutagenesis. *Mol Pharmacol*. 47(1) (1995) 88-98.
- [25] Abdul-Ridha, A. et al. Molecular determinants of allosteric modulation at the M1 muscarinic acetylcholine receptor. *J Biol Chem* 289(9) (2014) 6067-79.
- [26] Thal, D.M. et al. Crystal structures of the M1 and M4 muscarinic acetylcholine receptors. *Nature* 531(7594) (2016) 335-40.
- [27] Högger, P. et al. Activating and inactivating mutations in N- and C-terminal i3 loop junctions of muscarinic acetylcholine Hm1 receptors. *J Biol Chem*270(13) (1995) 7405-10.
- [28] Suga, H. et al. Effects of asparagine mutagenesis of conserved aspartic acids in helix 2 (D2.50) and 3 (D3.32) of M1-M4 muscarinic receptors on the irreversible binding of nitrogen mustard analogs of acetylcholine and McN-A-343. *Biochemistry* 52(29) (2013) 4914-28.
- [29] Leppik, R.A. et al. Role of acidic amino acids in the allosteric modulation by gallamine of antagonist binding at the m2 muscarinic acetylcholine receptor. *Mol Pharmacol* 45(5) (1994) 983-90.
- [30] Suga, H. et al. Mutagenesis of nucleophilic residues near the orthosteric binding pocket of M1 and M2 muscarinic receptors: effect on the binding of nitrogen mustard analogs of acetylcholine and McN-A-343. *Mol Pharmacol* 78(4) (2010) 745-55.
- [31] Heitz, F. et al. Site-directed mutagenesis of the putative human muscarinic M2 receptor binding site. *Eur J Pharmacol* 380(2-3) (1999) 183-95.
- [32] Gregory, K.J. et al. Identification of orthosteric and allosteric site mutations in M2 muscarinic acetylcholine receptors that contribute to ligand-selective signaling bias. *J Biol Chem* 285(10) (2010) 7459-74.
- [33] Blüml, K. et al. Functional role of a cytoplasmic aromatic amino acid in muscarinic receptor-mediated activation of phospholipase C. *J Biol Chem* 269(15) (1994) 11537-41.
- [34] Leach, K. et al. The role of transmembrane domain 3 in the actions of orthosteric, allosteric, and atypical agonists of the M4 muscarinic acetylcholine receptor. *Mol Pharmacol* 79(5) (2011) 855-65.
- [35] Zuscik, M.J. et al. Identification of a conserved switch residue responsible for selective constitutive activation of the beta2-adrenergic receptor. *J Biol Chem* 273(6) (1998) 3401-7.

- [36] Dohlman, H.G. et al. Role of extracellular disulfide-bonded cysteines in the ligand binding function of the beta 2-adrenergic receptor. *Biochemistry* 29(9) (1990) 2335-42.
- [37] Javitch, J.A. et al. Constitutive activation of the beta2 adrenergic receptor alters the orientation of its sixth membrane-spanning segment. *J Biol Chem* 272(30) (1997) 18546-9.
- [38] Gether, U. et al. Agonists induce conformational changes in transmembrane domains III and VI of the beta2 adrenoceptor. *EMBO J.* 16(22) (1997) 6737-47.
- [39] Rosenbaum, D.M. et al. GPCR engineering yields high-resolution structural insights into beta2-adrenergic receptor function. *Science* 318(5854) (2007) 1266-73.
- [40] Ghanouni, P. et al. The effect of pH on beta(2) adrenoceptor function. Evidence for protonation-dependent activation. *J Biol Chem.* 2000 Feb 4;275(5):3121-7.
- [41] Hanson, M.A. et al. A specific cholesterol binding site is established by the 2.8 Å structure of the human beta2-adrenergic receptor. *Structure.* 2008 Jun;16(6):897-905.
- [42] Jaakola, V.P. et al. The crystallographic structure of the human adenosine A2A receptor in a high-affinity antagonist-bound state: implications for GPCR drug screening and design. *Curr Opin Struct Biol.* 2010 Aug;20(4):401-14.
- [43] Lebon, G. et al. Agonist-bound adenosine A2A receptor structures reveal common features of GPCR activation. *Nature.* 2011 May 18;474(7352):521-5.
- [44] Swaminath, G. et al. Identification of an allosteric binding site for Zn<sup>2+</sup> on the beta2 adrenergic receptor. *J Biol Chem.* 2003 Jan 3;278(1):352-6.
- [45] Jensen, A.D. et al. Agonist-induced conformational changes at the cytoplasmic side of transmembrane segment 6 in the beta 2 adrenergic receptor mapped by site-selective fluorescent labeling. *J Biol Chem.* 2001 Mar 23;276(12):9279-90.
- [46] Gouldson, P.R. et al. A new approach to docking in the beta 2-adrenergic receptor that exploits the domain structure of G-protein-coupled receptors. *J Med Chem.* 1997 Nov 21;40(24):3871-86.
- [47] Schneider, E.H. et al. Impact of the DRY motif and the missing "ionic lock" on constitutive activity and G-protein coupling of the human histamine H4 receptor. *J Pharmacol Exp Ther.* 2010 May;333(2):382-92.
- [48] O'Dowd, B.F. et al. Site-directed mutagenesis of the cytoplasmic domains of the human beta 2-adrenergic receptor. Localization of regions involved in G protein-receptor coupling. *J Biol Chem.* 1988 Nov 5;263(31):15985-92.
- [49] Ballesteros, J.A. et al. Activation of the beta 2-adrenergic receptor involves disruption of an ionic lock between the cytoplasmic ends of transmembrane segments 3 and 6. *J Biol Chem.* 2001 Aug 3;276(31):29171-7.
- [50] Sheikh, S.P. et al. Similar structures and shared switch mechanisms of the beta2-adrenoceptor and the parathyroid hormone receptor. Zn(II) bridges between helices III and VI block activation. *J Biol Chem.* 1999 Jun 11;274(24):17033-41.
- [51] Fraser, C.M. Site-directed mutagenesis of beta-adrenergic receptors. Identification of conserved cysteine residues that independently affect ligand binding and receptor activation. *J Biol Chem.* 1989 Jun 5;264(16):9266-70.
- [52] Shi, L. et al. Beta2 adrenergic receptor activation. Modulation of the proline kink in transmembrane 6 by a rotamer toggle switch. *J Biol Chem.* 2002 Oct 25;277(43):40989-96.
- [53] Rasmussen, S.G. et al. Mutation of a highly conserved aspartic acid in the beta2 adrenergic receptor: constitutive activation, structural instability, and conformational rearrangement of transmembrane segment 6. *Mol Pharmacol.* 1999 Jul;56(1):175-84.



- [54] Hines, J. et al. Structural determinants for the activation mechanism of the angiotensin II type 1 receptor differ for phosphoinositide hydrolysis and mitogen-activated protein kinase pathways. *Biochem Pharmacol.* 2003 Jul 15;66(2):251-62.
- [55] Boucard, A.A. et al. Constitutive activation of the angiotensin II type 1 receptor alters the spatial proximity of transmembrane 7 to the ligand-binding pocket. *J Biol Chem.* 2003 Sep 19;278(38):36628-36. Epub 2003 Jul 3.
- [56] Marie, J. et al. Control of conformational equilibria in the human B2 bradykinin receptor. Modeling of nonpeptidic ligand action and comparison to the rhodopsin structure. *J Biol Chem.* 2001 Nov 2;276(44):41100-11. Epub 2001 Aug 8.
- [57] Le, M.T. et al. Angiotensin IV is a potent agonist for constitutive active human AT1 receptors. Distinct roles of the N-and C-terminal residues of angiotensin II during AT1 receptor activation. *J Biol Chem.* 2002 Jun 28;277(26):23107-10. Epub 2002 May 2.
- [58] Perlman, S. et al. Non-peptide angiotensin agonist. Functional and molecular interaction with the AT1 receptor. *J Biol Chem.* 1995 Jan 27;270(4):1493-6.
- [59] Auger-Messier, M. et al. The constitutively active N111G-AT1 receptor for angiotensin II maintains a high affinity conformation despite being uncoupled from its cognate G protein Gq/11alpha. *Endocrinology.* 2003 Dec;144(12):5277-84. Epub 2003 Aug 13.
- [60] Perlman, S. et al. Dual agonistic and antagonistic property of nonpeptide angiotensin AT1 ligands: susceptibility to receptor mutations. *Mol Pharmacol.* 1997 Feb;51(2):301-11.
- [61] Charron, P. et al. Are we ready for pharmacogenomics in heart failure? *Eur J Pharmacol.* 2001 Apr 6;417(1-2):1-9.
- [62] de Mendonça, F.L. et al. Site-directed mutagenesis of CC chemokine receptor 1 reveals the mechanism of action of UCB 35625, a small molecule chemokine receptor antagonist. *J Biol Chem.* 2005 Feb 11;280(6):4808-16.
- [63] Vaidehi, N. et al. Predictions of CCR1 chemokine receptor structure and BX 471 antagonist binding followed by experimental validation. *J Biol Chem.* 2006 Sep 15;281(37):27613-20.
- [64] Garcia-Perez, J. et al. Allosteric model of maraviroc binding to CC chemokine receptor 5 (CCR5). *J Biol Chem.* 2011 Sep 23;286(38):33409-21.
- [65] Dragic, T. et al. A binding pocket for a small molecule inhibitor of HIV-1 entry within the transmembrane helices of CCR5. *Proc Natl Acad Sci U S A.* 2000 May 9;97(10):5639-44.
- [66] Maeda, K. et al. Involvement of the second extracellular loop and transmembrane residues of CCR5 in inhibitor binding and HIV-1 fusion: insights into the mechanism of allosteric inhibition. *J Mol Biol.* 2008 Sep 12;381(4):956-74. doi: 10.1016/j.jmb.2008.06.041. Epub 2008 Jun 20.
- [67] Govaerts, C. et al. The TXP motif in the second transmembrane helix of CCR5. A structural determinant of chemokine-induced activation. *J Biol Chem.* 2001 Apr 20;276(16):13217-25. Epub 2001 Jan 25.
- [68] Murphy, J.W. et al. Integrity of extracellular loop 1 of the human cannabinoid receptor 1 is critical for high-affinity binding of the ligand CP 55,940 but not SR 141716A. *Biochem Pharmacol.* 2003 May 15;65(10):1623-31.
- [69] McAllister, S.D. et al. Cannabinoid receptors can activate and inhibit G protein-coupled inwardly rectifying potassium channels in a xenopus oocyte expression system. *J Pharmacol Exp Ther.* 1999 Nov;291(2):618-26.

- [70] Tao, Q. et al. Mutation of a highly conserved aspartate residue in the second transmembrane domain of the cannabinoid receptors, CB1 and CB2, disrupts G-protein coupling. *J Pharmacol Exp Ther.* 1998 May;285(2):651-8.
- [71] Roche, J.P. et al. A mutation in the second transmembrane region of the CB1 receptor selectively disrupts G protein signaling and prevents receptor internalization. *Mol Pharmacol.* 1999 Sep;56(3):611-8.
- [72] McAllister, S.D. et al. A critical role for a tyrosine residue in the cannabinoid receptors for ligand recognition. *Biochem Pharmacol.* 2002 Jun 15;63(12):2121-36.
- [73] Pan, X. et al. SR 141716A acts as an inverse agonist to increase neuronal voltage-dependent Ca<sup>2+</sup> currents by reversal of tonic CB1 cannabinoid receptor activity. *Mol Pharmacol.* 1998 Dec;54(6):1064-72.
- [74] Tao, Q. et al. Role of a conserved lysine residue in the peripheral cannabinoid receptor (CB2): evidence for subtype specificity. *Mol Pharmacol.* 1999 Mar;55(3):605-13.
- [75] Chin, C.N. The third transmembrane helix of the cannabinoid receptor plays a role in the selectivity of aminoalkylindoles for CB2, peripheral cannabinoid receptor. *J Pharmacol Exp Ther.* 1999 Nov;291(2):837-44.
- [76] Song, Z.H. et al. A lysine residue of the cannabinoid receptor is critical for receptor recognition by several agonists but not WIN55212-2. *Mol Pharmacol.* 1996 May;49(5):891-6.
- [77] Hurst, D.P. et al. N-(piperidin-1-yl)-5-(4-chlorophenyl)-1-(2,4-dichlorophenyl)-4-methyl-1H-pyrazole-3-carboxamide (SR141716A) interaction with LYS 3.28(192) is crucial for its inverse agonism at the cannabinoid CB1 receptor. *Mol Pharmacol.* 2002 Dec;62(6):1274-87.
- [78] Latek, D. et al. Modeling of ligand binding to G protein coupled receptors: cannabinoid CB1, CB2 and adrenergic  $\beta$  2 AR. *J Mol Model.* 2011 Sep;17(9):2353-66.
- [79] Rhee, M.H. et al. Role of the highly conserved Asp-Arg-Tyr motif in signal transduction of the CB2 cannabinoid receptor. *FEBS Lett.* 2000 Jan 28;466(2-3):300-4.
- [80] Mansour, A. et al. Site-directed mutagenesis of the human dopamine D2 receptor. *Eur J Pharmacol.* 1992 Oct 1;227(2):205-14.
- [81] Javitch, J.A. et al. Mapping the binding-site crevice of the dopamine D2 receptor by the substituted-cysteine accessibility method. *Neuron.* 1995 Apr;14(4):825-31.
- [82] Wang, S. et al. Structure of the D2 dopamine receptor bound to the atypical antipsychotic drug risperidone. *Nature.* 2018 Mar 8;555(7695):269-273.
- [83] Javitch, J.A. et al. A cysteine residue in the third membrane-spanning segment of the human D2 dopamine receptor is exposed in the binding-site crevice. *Proc Natl Acad Sci U S A.* 1994 Oct 25;91(22):10355-9.
- [84] Lee, S.P. et al. Inhibition of cell surface expression by mutant receptors demonstrates that D2 dopamine receptors exist as oligomers in the cell. *Mol Pharmacol.* 2000 Jul;58(1):120-8.
- [85] Fowler, J.C. et al. Receptor conformations involved in dopamine D(2L) receptor functional selectivity induced by selected transmembrane-5 serine mutations. *Mol Pharmacol.* 2012 Jun;81(6):820-31.
- [86] Javitch, J.A. A cluster of aromatic residues in the sixth membrane-spanning segment of the dopamine D2 receptor is accessible in the binding-site crevice. *Biochemistry.* 1998 Jan 27;37(4):998-1006.
- [87] Simpson, M.M. et al. Dopamine D4/D2 receptor selectivity is determined by A divergent aromatic microdomain contained within the second, third, and seventh membrane-spanning segments. *Mol Pharmacol.* 1999 Dec;56(6):1116-26.

- [88] Ehrlich, K. et al. Dopamine D2, D3, and D4 selective phenylpiperazines as molecular probes to explore the origins of subtype specific receptor binding. *J Med Chem.* 2009 Aug 13;52(15):4923-35.
- [89] Sartania, N. et al. Role of conserved serine residues in the interaction of agonists with D3 dopamine receptors. *J Neurochem.* 1999 Jun;72(6):2621-4.
- [90] Ferruz, N. et al. Dopamine D3 receptor antagonist reveals a cryptic pocket in aminergic GPCRs. *Sci Rep.* 2018 Jan 17;8(1):897.
- [91] Alberts, G.L. et al. Contributions of cysteine 114 of the human D3 dopamine receptor to ligand binding and sensitivity to external oxidizing agents. *Br J Pharmacol.* 1998 Oct;125(4):705-10.
- [92] Pogozeva, I.D. et al. Opioid receptor three-dimensional structures from distance geometry calculations with hydrogen bonding constraints. *Biophys J.* 1998 Aug;75(2):612-34.
- [93] Chakrabarti, S. et al. The mu-opioid receptor down-regulates differently from the delta-opioid receptor: requirement of a high affinity receptor/G protein complex formation. *Mol Pharmacol.* 1997 Jul;52(1):105-13.
- [94] Petäjä-Repo, U.E. et al. Ligands act as pharmacological chaperones and increase the efficiency of delta opioid receptor maturation. *EMBO J.* 2002 Apr 2;21(7):1628-37.
- [95] Kam, K.W. et al. Constitutive activation of the opioid receptor-like (ORL1) receptor by mutation of Asn133 to tryptophan in the third transmembrane region. *J Neurochem.* 2002 Dec;83(6):1461-70.
- [96] Mouldous, L. et al. Functional inactivation of the nociceptin receptor by alanine substitution of glutamine 286 at the C terminus of transmembrane segment VI: evidence from a site-directed mutagenesis study of the ORL1 receptor transmembrane-binding domain. *Mol Pharmacol.* 2000 Mar;57(3):495-502.
- [97] Neidhardt, J. et al. Different amino acid substitutions at the same position in rhodopsin lead to distinct phenotypes. *Invest Ophthalmol Vis Sci.* 2006 Apr;47(4):1630-5.
- [98] Perez, D.M. et al. Multiple signaling states of G-protein-coupled receptors. *Pharmacol Rev.* 2005 Jun;57(2):147-61.
- [99] Kim, J.M. et al. Structural origins of constitutive activation in rhodopsin: Role of the K296/E113 salt bridge. *Proc Natl Acad Sci U S A.* 2004 Aug 24;101(34):12508-13.
- [100] Iakhine, R. et al. Novel dominant rhodopsin mutation triggers two mechanisms of retinal degeneration and photoreceptor desensitization. *J Neurosci.* 2004 Mar 10;24(10):2516-26.
